# Supplementary material for: Mob1: defining cell polarity for proper cell division
Source: Oxford University Press journal article supplement (doi:10.1242/jcs.096610), 2012-01-15
Supplement: jcs096610figs1.pdf [file jcs096610figs1.pdf]

Figure S1

A

|      |                        |                                                                           |     |  |
|------|------------------------|---------------------------------------------------------------------------|-----|--|
| Mobl | <i>T.thermophila</i>   | -----                                                                     |     |  |
| Mobl | <i>H. sapiens</i>      | -----                                                                     |     |  |
| Mobl | <i>M. musculus</i>     | -----                                                                     |     |  |
| Mobl | <i>G.gallus</i>        | -----                                                                     |     |  |
| Mobl | <i>X. laevis</i>       | -----                                                                     |     |  |
| Mobl | <i>D. rerio</i>        | -----                                                                     |     |  |
| Mobl | <i>D. melanogaster</i> | -----                                                                     |     |  |
| Mobl | <i>A. thaliana</i>     | -----                                                                     |     |  |
| Mobl | <i>Z. mays</i>         | -----                                                                     |     |  |
| Mobl | <i>S. cerevisae</i>    | MSFLQNFHISPGQTI RSTRGFKWNTANAANNAGSVSPTKATPHNNTINGNNNNANTINNR             | 60  |  |
| Mobl | <i>D. fasciculatum</i> | -----                                                                     |     |  |
|      |                        |                                                                           |     |  |
| Mobl | <i>T.thermophila</i>   | -----MSQKTYKPKQ-IEK                                                       | 13  |  |
| Mobl | <i>H. sapiens</i>      | -----MSFLFGSRSSKTFKPKKNIPE                                                | 21  |  |
| Mobl | <i>M. musculus</i>     | -----                                                                     |     |  |
| Mobl | <i>G.gallus</i>        | -----MSFLYGSRRSSKTFKPKKNIPE                                               | 21  |  |
| Mobl | <i>X. laevis</i>       | -----MSFLFGNRSSKTFKPKKSLPE                                                | 21  |  |
| Mobl | <i>D. rerio</i>        | -----MSFLFGSRSSKTFKPKKNIPE                                                | 21  |  |
| Mobl | <i>D. melanogaster</i> | -----MDFLFGSRSSKTFKPKKNIPE                                                | 21  |  |
| Mobl | <i>A. thaliana</i>     | -----MSFLGGLGRNQKTFRPKKSAPS                                               | 21  |  |
| Mobl | <i>Z. mays</i>         | -----MSFLGGLGRNQKTFRPKKSAPS                                               | 21  |  |
| Mobl | <i>S. cerevisae</i>    | ADFTNNPVNGYNESDHGRMSPVLTTPKRHAPPEQLQNVTDENYTPSHQKPFLLQPAGTT               | 120 |  |
| Mobl | <i>D. fasciculatum</i> | -----MFSKKS-QTFKPKKNIQE                                                   | 17  |  |
|      |                        |                                                                           |     |  |
| Mobl | <i>T.thermophila</i>   | GSRGWGLKHHIAQMTLGS-GNMSLAVELPQGEKNEWLAVNTIEFYNEISILYGLTLMFECT             | 72  |  |
| Mobl | <i>H. sapiens</i>      | GSHQYELLKHA EATLGS-GNLRMAVMLPEGEDLNEWVAVNTVDFFNQINMLYGTITDFCT             | 80  |  |
| Mobl | <i>M. musculus</i>     | -----LYGTITDFCT                                                           | 10  |  |
| Mobl | <i>G.gallus</i>        | GSHQYELLKHA EATLGS-GNLRMAVMLPEGEDLNEWVAVNTVDFFNQINMLYGTITDFCT             | 80  |  |
| Mobl | <i>X. laevis</i>       | GSHQYELLKHA EATLGS-GNLRMAVMLPEGEDLNEWVAVNTVDFFNQINMLYGTITDFCT             | 80  |  |
| Mobl | <i>D. rerio</i>        | GSHQYELLKHA EATLGS-GNLRMAVMLPDGEDLNEWVAVNTVDFFNQINMLYGTITDFCT             | 80  |  |
| Mobl | <i>D. melanogaster</i> | GTHQYDLMKHA AATLGS-GNLRNAVALPDGEDLNEWVAVNTVDFFNQINMLYGTITDFCT             | 80  |  |
| Mobl | <i>A. thaliana</i>     | GSKGAQLRKHIDATLGS-GNLR EAVRLPPGEDANEWLAVNTVDFFNQVNLlyGLTLTEFCT            | 80  |  |
| Mobl | <i>Z. mays</i>         | GSKGAQLRKHIDATLGS-GNLR EAVRLPPGEDINEWLAVNTVDFFNQVNLlyGLTLTEFCT            | 80  |  |
| Mobl | <i>S. cerevisae</i>    | VTTHQDIKQIVEMTLGSEGLNQA VKLPRGEDENEWLAVHCVDFYQINMLYGSITDFCS               | 180 |  |
| Mobl | <i>D. fasciculatum</i> | GSKQYQLKQYAEATLGS-GNLR LAVSLPAGEDLNEWLAVNTVDFFNQINMLYGTITDFCT             | 76  |  |
|      |                        | ***: : **:                                                                |     |  |
|      |                        |                                                                           |     |  |
| Mobl | <i>T.thermophila</i>   | PEACPIMSAGPKY EYLWADGQV R TPLKVSASEYIDY LMTWVETQINNESLFPCQIGVPF           | 132 |  |
| Mobl | <i>H. sapiens</i>      | EESCVPMSAGPKY EYHWADGTNIKKPIKCSAPKYIDY LMTWVQDQLDDETLFPSKIGVPF            | 140 |  |
| Mobl | <i>M. musculus</i>     | EESCVPMSAGPKY EYHWADGTNIKKPIKCSAPKYIDY LMTWVQDQLDDETLFPSKIGVPF            | 70  |  |
| Mobl | <i>G.gallus</i>        | EESCVPMSAGPKY EYHWADGTNIKKPIKCSAPKYIDY LMTWVQDQLDDETLFPSKIGVPF            | 140 |  |
| Mobl | <i>X. laevis</i>       | EESCVPMSAGPKY EYHWADGTNIKKPIKCSAPKYIDY LMTWVQDQLDDETLFPSKIGVPF            | 140 |  |
| Mobl | <i>D. rerio</i>        | EESCPLMSAGPKY EYHWADGTNIKKPIKCSAPKYIDY LMTWVQDQLDDETLFPSKIGVPF            | 140 |  |
| Mobl | <i>D. melanogaster</i> | EETCGIMSAGPKY EYHWADGLTVKKPIKCSAPKYIDY LMTWVQDQLDDETLFPSKIGVPF            | 140 |  |
| Mobl | <i>A. thaliana</i>     | PDNCPMTAGPKY EYRWADGVQIKKPIEVSAPKYVEY LMDWIE TQDDETLFPQLGAPF              | 140 |  |
| Mobl | <i>Z. mays</i>         | PESCPMTAGPKY EYRWADGVQIKKPIEVSAPKYVEY LMDWIE TQDDETLFPQLGAPF              | 140 |  |
| Mobl | <i>S. cerevisae</i>    | PQTCPRMIATNEYEYLWAFQ-KGQPPVSVSAPKYVECLMRWQDQDDESLFPSKIVGTF                | 239 |  |
| Mobl | <i>D. fasciculatum</i> | TSECPMSAGPKY EYHWADGTTVKKAIKVSAP EYVDY LMTWVQSQDDESLFPSKIGVLF             | 136 |  |
|      |                        | . * * * : * * * * * : . : . * * . : * * * : * * * : * * * : * * * : *     |     |  |
|      |                        |                                                                           |     |  |
| Mobl | <i>T.thermophila</i>   | PKNFLS-VIKVIFKRLFRVYAH IYHSHFQHIMSLGLE YHLNLCFKHF IYFID EFDLVDK           | 191 |  |
| Mobl | <i>H. sapiens</i>      | PKNFMS-VAKTILKRLFRVYAH IYHQHFD PVIQLQEEAHLNLSFKHF IFFVQEFNLIDRR           | 199 |  |
| Mobl | <i>M. musculus</i>     | PKNFMS-VAKTILKRLFRVYAH IYHQHFD PVIQLQEEAHLNLSFKHF IFFVQEFNLIDRR           | 129 |  |
| Mobl | <i>G.gallus</i>        | PKNFMS-VAKTILKRLFRVYAH IYHQHFD PVIQLQEEAHLNLSFKHF IFFVQEFNLIDRR           | 199 |  |
| Mobl | <i>X. laevis</i>       | PKNFMS-VAKTILKRLFRVYAH IYHQHFD S VIQLQEEAHLNLSFKHF IFFVQEFNLIDRR          | 199 |  |
| Mobl | <i>D. rerio</i>        | PKNFMS-VAKTILKRLFRVYAH IYHQH FESVIQLQEEAHLNLSFKHF IFFVQEFNLIDRK           | 199 |  |
| Mobl | <i>D. melanogaster</i> | PKNFHS-SAKTILKRLFRVYAH IYHQH FTEVVTLGEAHLNLSFKHF IFFVQEFNLIERR            | 199 |  |
| Mobl | <i>A. thaliana</i>     | PQNFKD-VVKTIFKRLFRVYAH IYHSHFQKIVSLKEEAHLNLCFKHF ILFTH EFGIDKK            | 199 |  |
| Mobl | <i>Z. mays</i>         | PPNFKE-VVKTIFKRLFRVYAH TYHSHFQKIVSLKEEAHLNLCFKHF ILFTNEFGLIDKK            | 199 |  |
| Mobl | <i>S. cerevisae</i>    | PEGFIQRVIQPI LRRFRVYAH IYCHHFNE ILELNLQTVLNTSFRHFCLFAQEFELLRPA            | 299 |  |
| Mobl | <i>D. fasciculatum</i> | PKNFQS-IVKTIFKRLFRVYAH IYHSHFQKIVNLGEEAHLNLSLKHFIFFIQEFNLVDK              | 195 |  |
|      |                        | * . * . : * * * * * * * * * * : * * : * * : * * * : * * * * * * * * * * : |     |  |
|      |                        |                                                                           |     |  |
| Mobl | <i>T.thermophila</i>   | ELAPLAE LIQQFKARKEVPQTQQ                                                  | 214 |  |
| Mobl | <i>H. sapiens</i>      | ELAPLQELIEKLT SKDR-----                                                   | 216 |  |
| Mobl | <i>M. musculus</i>     | ELAPLQELIEKLT SKDR-----                                                   | 146 |  |
| Mobl | <i>G.gallus</i>        | ELAPLQELIEKLT SKDR-----                                                   | 216 |  |
| Mobl | <i>X. laevis</i>       | EQAPLQELIEKLT SKDR-----                                                   | 216 |  |
| Mobl | <i>D. rerio</i>        | ELAPLQELIEKLT SKDR-----                                                   | 216 |  |
| Mobl | <i>D. melanogaster</i> | ELAPLQELIDKLTAKDERQI---                                                   | 219 |  |
| Mobl | <i>A. thaliana</i>     | ELAPLQELIESIISPY-----                                                     | 215 |  |
| Mobl | <i>Z. mays</i>         | ELAPLQELIESIIVPY-----                                                     | 215 |  |
| Mobl | <i>S. cerevisae</i>    | DFGPLELVMELRDR-----                                                       | 314 |  |
| Mobl | <i>D. fasciculatum</i> | ELGPLSELIE TLIKN-----                                                     | 210 |  |
|      |                        | : . * * * * * :                                                           |     |  |

Figure S1

B

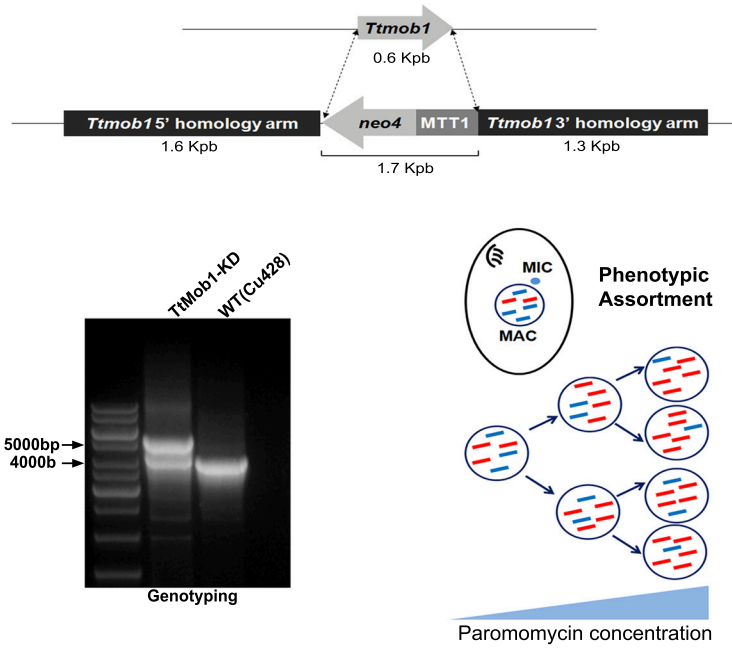

C

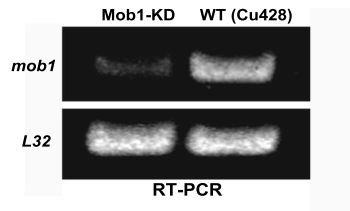

**Figure S1. The creation of the *Tetrahymena thermophila* TtMob1 knockdown strain.** (A) Amino acid sequence alignment of *Tetrahymena thermophila* TtMob1 (XP\_001031965), *Homo sapiens* (NP\_775739.1), *Mus musculus* (AAI04404.1), *Gallus gallus* (XP\_420601.1), *Xenopus laevis* (NP\_001085265.1), *Danio rerio* (NP\_956494.1), *Drosophila melanogaster* (AAF55993.2), *Arabidopsis thaliana* (NP\_199368.1), *Zea mays* (ACG45985.1), *Saccharomyces cerevisiae* (DAA08447.1) and *Dictyostelium fasciculatum* (EGG23319.1). These proteins share an amino-acid sequence identity in the range of 49% to 62%. (B) (Top) Schematic representation of the construct used to disrupt the *Ttmob1* locus, originating the TtMob1-KD strain. (Left) PCR analysis of genomic DNA (gDNA) obtained from WT (Cu428 strain) and TtMob1-KD to confirm their genotype. gDNA was amplified with specific primers to the homology arms of 5' and 3' flanking regions of *Ttmob1* gene. For WT strain it was observed only one band corresponding to WT allele (4 kb), whereas in TtMob1KD cells an additional band corresponding to the disrupted-alleles *Ttmob1* is visible (5 kb). (Right) Schematic representation of phenotypic assortment in *Tetrahymena* macronuclear genome. The larger circle represents the MAC and the small blue circle indicates the MIC. For simplicity the MAC genetic content is represented by six copies of one autonomous replicating piece with WT *Ttmob1* allele (blue lines) and the knockout *Ttmob1* allele (red lines). In cells reproducing asexually, the MAC (45n) divides amitotically, which leads to a random distribution of allelic copies into daughter cells. Genetically transformed cells in the MAC can be pressed to increase the number of disrupted allelic copies by increasing the concentration of the selection drug, paromomycin, in the growth media. (C) RT-PCR analysis of *Ttmob1* expression in TtMob1-KD and in WT (Cu428 strain) cells showing the *Ttmob1* decreased levels in TtMob1-KD cells. The ribosomal protein *L32* coding gene was used as control.
