# Supplementary material for: Mob1: defining cell polarity for proper cell division
Source: Oxford University Press journal article supplement (doi:10.1242/jcs.096610), 2012-01-15
Supplement: jcs096610figs2.pdf [file jcs096610figs2.pdf]

Figure S2

A

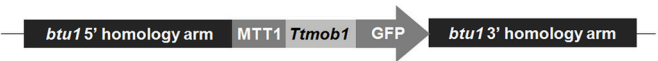

B

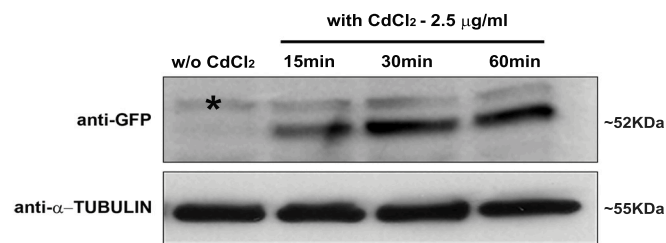

C

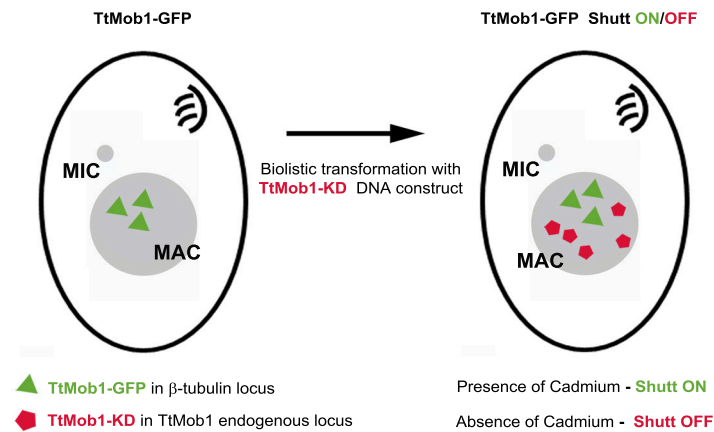

**Figure S2. TtMob1-GFP ShuttON/OFF *Tetrahymena* strain.** **(A)** Schematic representation of the DNA construct used to create the TtMob1-GFP strain. DNA was inserted by homologous recombination in the endogenous locus of the *BTU1* gene in the macronucleus of Cu522 strain cells **(B)** Western blot of total proteins obtained from TtMob1-GFP growing in medium without/with  $\text{Cd}^{2+}$  (2.5 $\mu\text{g/ml}$ ) at 15, 30 and 60 min of induction. Protein extracts were probed with anti-GFP antibody and with anti- $\alpha$ -tubulin antibody, used as loading control. Unspecific band (\*). **(C)** TtMob1-GFP cells were biolistically transformed with the DNA construct to disrupt the endogenous *Ttmob1* locus (Fig 1A). Significantly, during transformants' selection with paromomycin,  $\text{Cd}^{2+}$  was added to the growth medium (see material and methods) to drive the expression of the NEO4 cassette. Consequently, TtMob1-GFP was also induced, which might compensate the increasing disruption of *Ttmob1* alleles. Thus, as expected, the sub-lethal dose of paromomycin achieved for this strain was considerably higher (9000 $\mu\text{g/ml}$ ) than the obtained for TtMob1-KD cells (2800  $\mu\text{g/ml}$ ), indicating that the number of *Ttmob1* disrupted copies was higher. In support of this view, the TtMob1 depletion phenotypes frequencies were higher in TtMob1 ShuttON/OFF in comparison to TtMob1-KD cells (see Table 1).
